# Supplementary material for: Preclinical Evaluation of 99mTc-ZHER2:41071, a Second-Generation Affibody-Based HER2-Visualizing Imaging Probe with a Low Renal Uptake
Source: MDPI journal article supplement (doi:10.3390/ijms22052770), 2021-03-09
Supplement: s1 [file s1]

**Table S1.** Storage stability of ZHER2:41071 and ZHER2:V2 by Reversed Phase UPLC.

| Peptide                    | Storage Conditions | % Monomer | % Dimer | % Unidentified Peaks |
|----------------------------|--------------------|-----------|---------|----------------------|
| ZHER2:41071<br>Lyophilized | -0 °C, 0 month     | 92.9      | 2.3     | 4.8                  |
|                            | -20 °C, 6 months   | 91.8      | 2.6     | 5.6                  |
| ZHER2:41071<br>Dissolved * | -80 °C, 1 month    | 91.1      | 4.1     | 4.8                  |
|                            | -80 °C, 3 months   | 90.2      | 4.2     | 5.6                  |
|                            | -80 °C, 6 months   | 90.9      | 3.9     | 5.2                  |
|                            | +5 °C, 1 month     | 88.4      | 6.5     | 5.1                  |
|                            | +5 °C, 3 months    | 84.8      | 9.3     | 5.9                  |
|                            | +5 °C, 6 months    | 81.8      | 11.5    | 6.7                  |
| ZHER2:V2<br>Lyophilized    | -20 °C, 0 month    | N/A       | N/A     | N/A                  |
|                            | -20 °C, 6 months   | 92.8      | 2.5     | 4.7                  |
| ZHER2:V2<br>Dissolved*     | -80 °C, 1 month    | 90.5      | 4.5     | 5.0                  |
|                            | -80 °C, 3 months   | 92.0      | 5.0     | 3.0                  |
|                            | -80 °C, 6 months   | 91.5      | 4.9     | 3.6                  |
|                            | +5 °C, 1 month     | 88.8      | 6.6     | 4.7                  |
|                            | +5 °C, 3 months    | 88.2      | 8.3     | 3.5                  |
|                            | +5 °C, 6 months    | 85.8      | 9.9     | 4.3                  |

\* Dissolved in PBS pH 7.4 containing 2 mM EDTA.

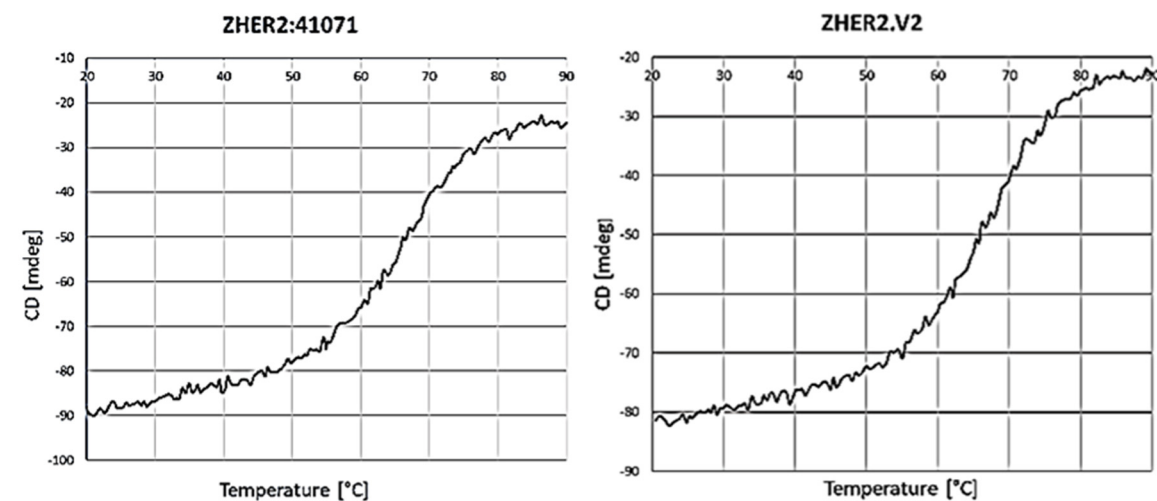

**Figure S1.** Variable temperature measurement (VTM) on ZHER2:41071 and ZHER2.V2. At the VTM the absorbance was measured at 221 nm while the temperature was raised from 20 to 90 °C with a temperature slope of 5 °C/min. T<sub>m</sub> is the temperature where the slope of the CD vs temperature curve is the highest.

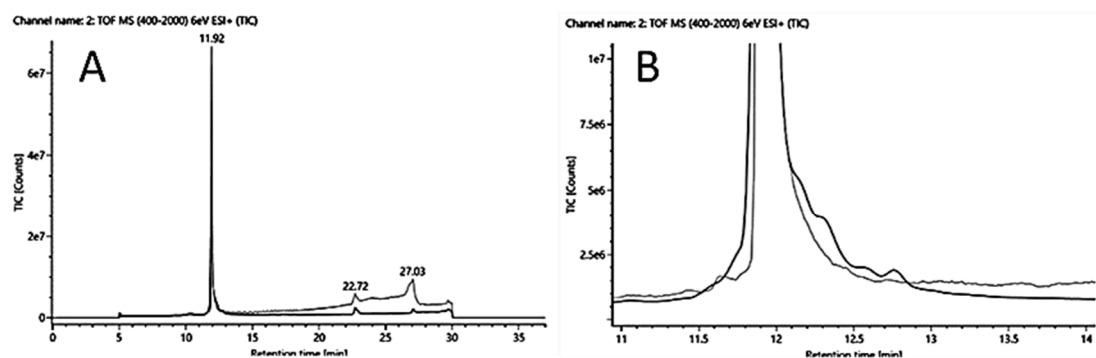

**Figure S2.** ZHER2:41071 Affibody peptide stability at labelling conditions. Full size (A) and enlarged total ion chromatogram (B) before (grey) and after (black) heat treatment.

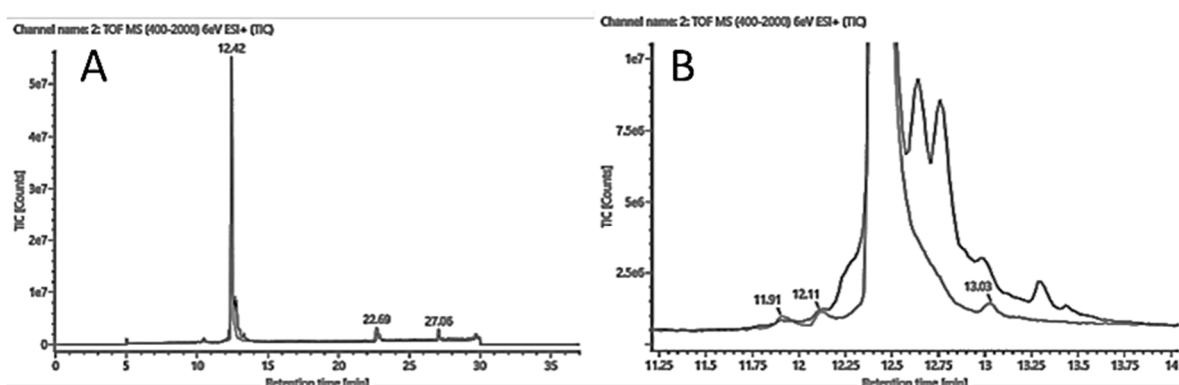

**Figure S3.** ZHER2:V2 Affibody peptide stability at labelling conditions. Full size (A) and enlarged total ion chromatogram (B) before (grey) and after (black) heat treatment.

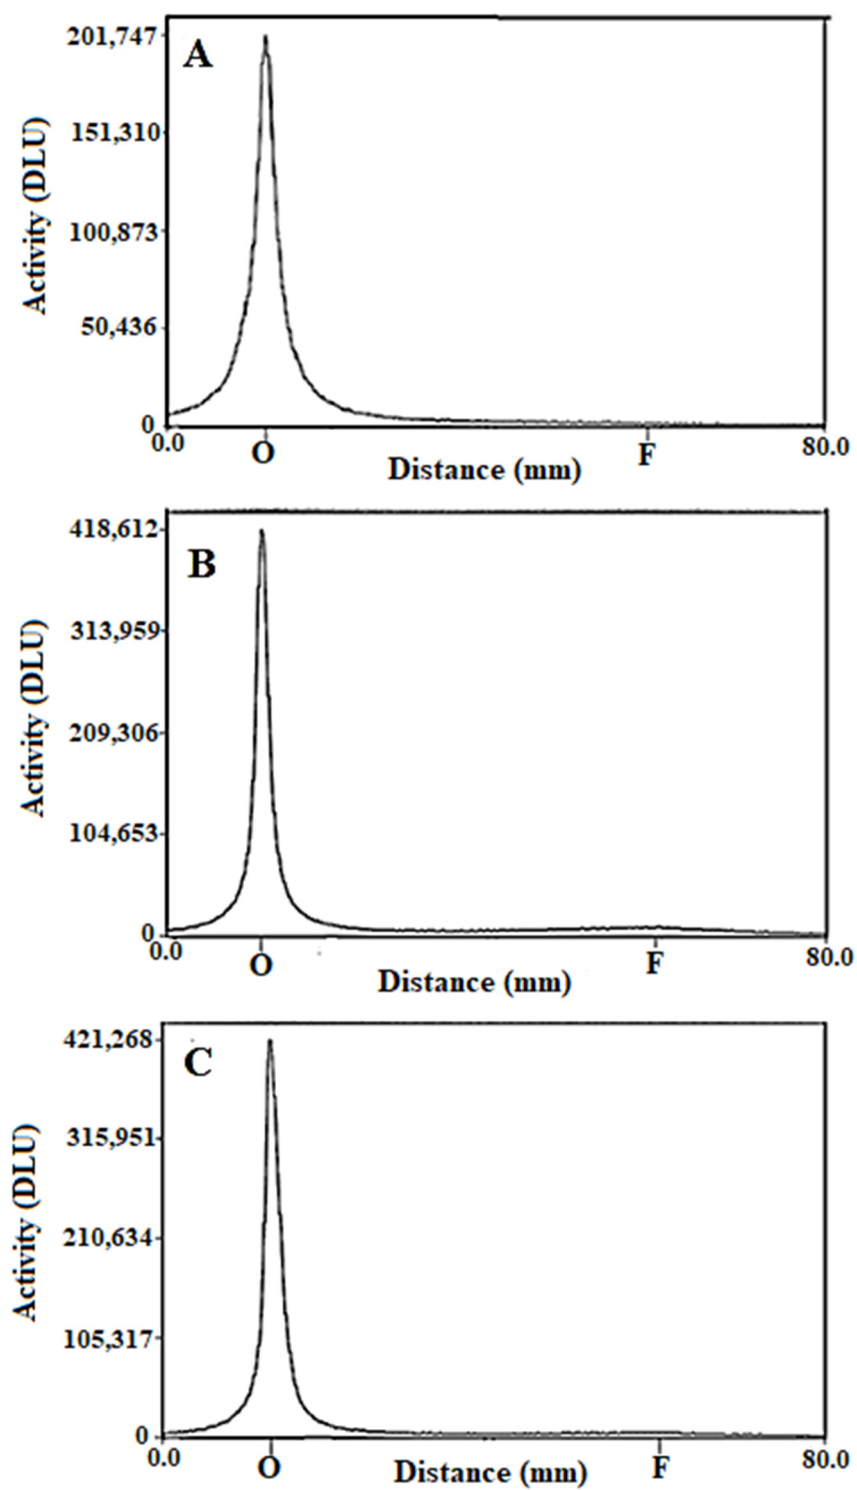

**Figure S4.** Distribution of radioactivity of (A)  $[^{99m}\text{Tc}]$ Tc-ZHER2:2395, (B)  $[^{99m}\text{Tc}]$ Tc-ZHER2:41071 and (C)  $[^{99m}\text{Tc}]$ Tc-ZHER2:V2 along ITLC strip. Retardation factor of labelled conjugate is 0.0 and that of free  $^{99m}\text{Tc}$  is 1.0.

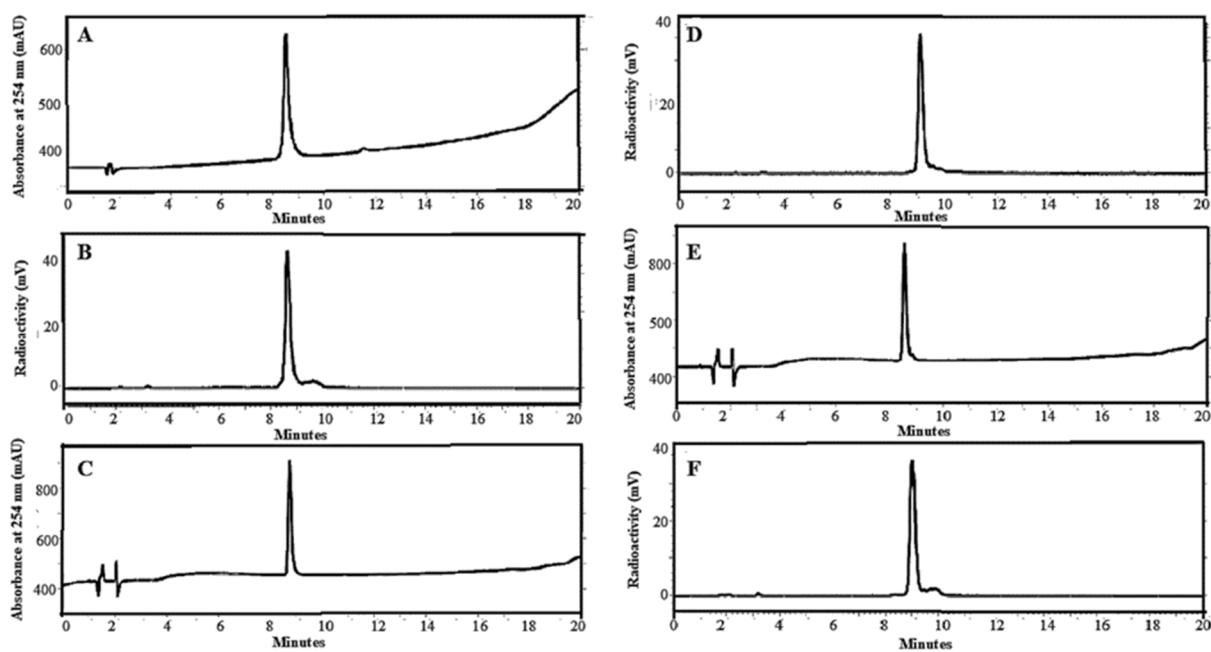

**Figure S5.** Characterization of anti-HER2 Affibody molecules. Reversed-phase HPLC chromatograms of non-labelled (A) ZHER2:2395, (C) ZHER2:41071 and (E) ZHER2:V2; and the radiochromatogram of (B) [ $^{99m}\text{Tc}$ ]Tc-ZHER2:2395, (D) [ $^{99m}\text{Tc}$ ]Tc-ZHER2:41071 and (F) [ $^{99m}\text{Tc}$ ]Tc-ZHER2:V2. The retention times (Rt) are expressed in minutes.

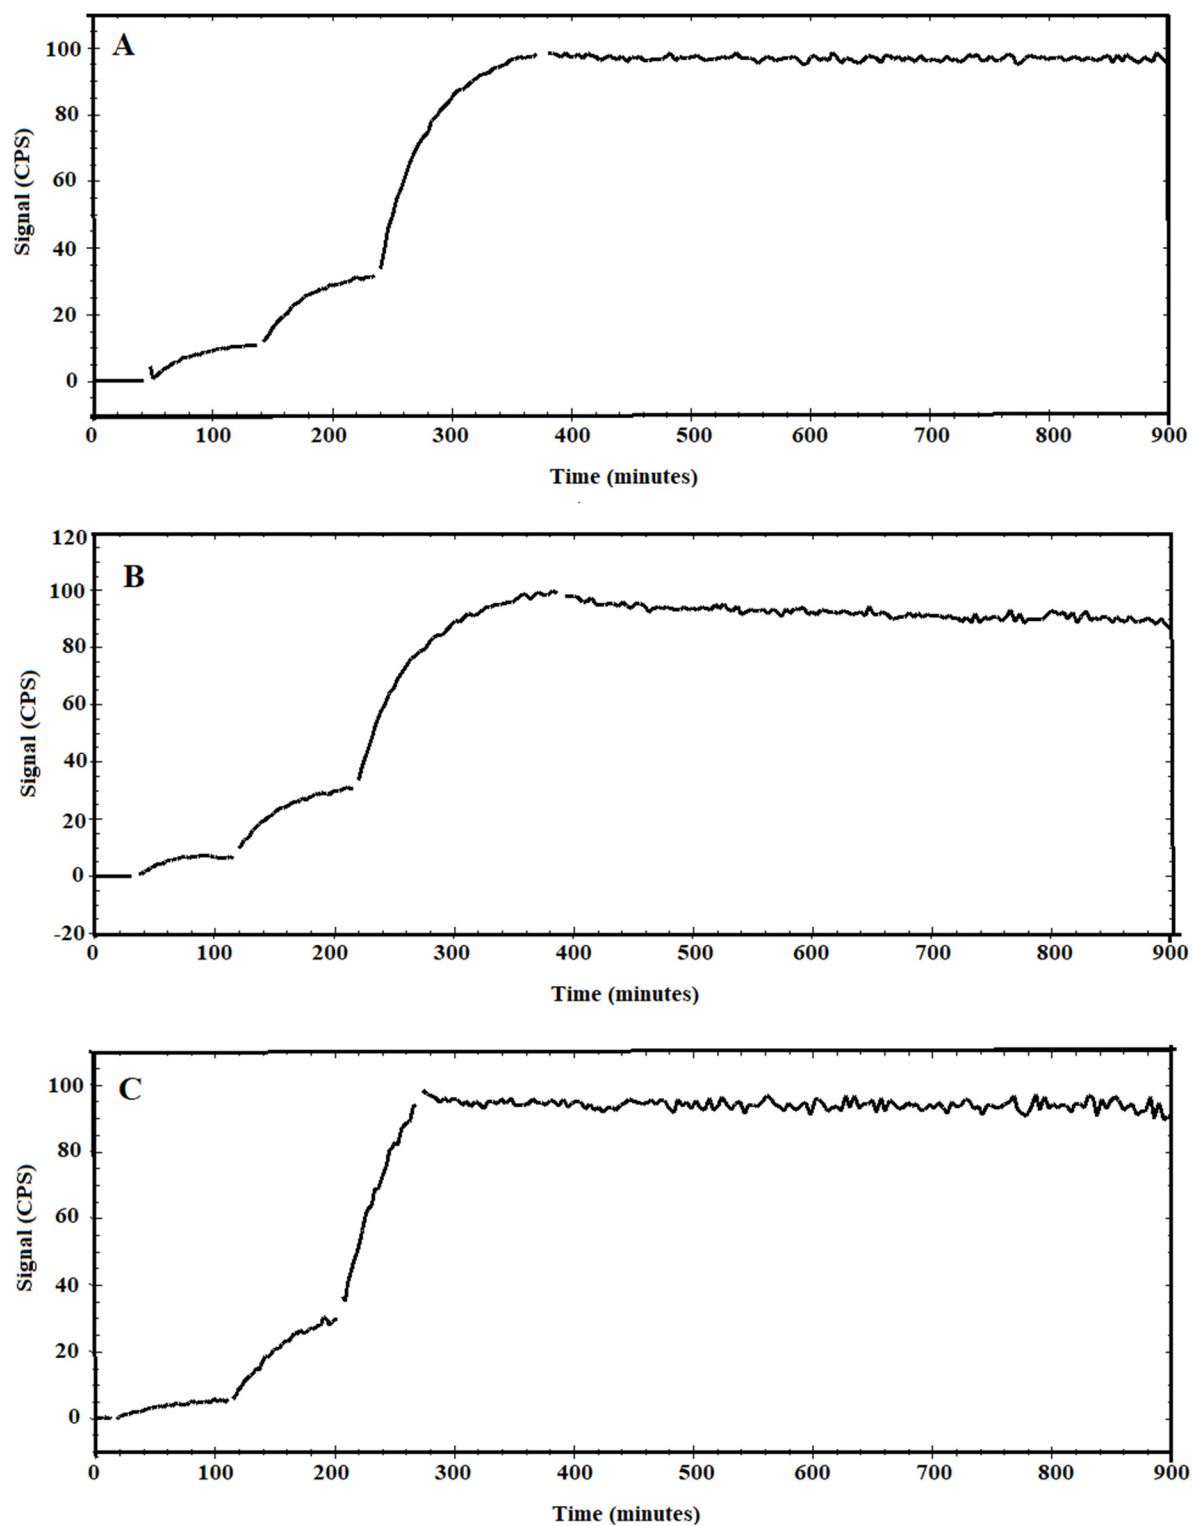

**Figure S6.** Binding curve of (A)  $[^{99m}\text{Tc}]\text{Tc-ZHER2:2395}$ , (B)  $[^{99m}\text{Tc}]\text{Tc-ZHER2:41071}$  and (C)  $[^{99m}\text{Tc}]\text{Tc-ZHER2:V2}$  binding to HER2-expressing SKOV3 cells. Input data are obtained from LigandTracer measurement of cell-bound activity during association of labelled compounds to and dissociation from SKOV-3 cells. Binding was measured at three different concentrations: 0.33, 1 and 3 nM. Measurement was performed in duplicates.
